# Supplementary material
Source: publisher figshare collection journal article supplement (https://frontiersin.figshare.com/ndownloader/files/14167766)
Supplement: Supplementary file 1 [file 14167766]

Revealing spider silk’s 3D nanostructure through low temperature plasma etching and advanced low-voltage SEM

**Supplementary information**

Nicola Stehling1, Kerry J. Abrams1, Chris Holland1, Cornelia Rodenburg1,*

1University of Sheffield, Department of Materials Science and Engineering, Sheffield S1 3JD, United Kingdom

*** Correspondence:**Cornelia Rodenburg
C.Rodenburg@sheffield.ac.uk

| **Nanostructure size distribution** | **Nanostructure Voronoi distance distribution** | **Inter-nanostructure distance distribution** |
| --- | --- | --- |
|  |  |  |
| **Fig. S1:** Particle analysis of nanostructure in hyperspectral images: a) Histogram of size distribution of nanostructure b) Histogram of Voronoi distance distribution and c) Histogram of inter-nanostructure distance for the three different reeling speeds. The frequency was normalised to the the total of the evaluated pixels in the image. The bin means are indicated by the round markers. | | |
